# Supplementary material for: Absence of Adiponutrin (PNPLA3) and Monoacylglycerol Lipase Synergistically Increases Weight Gain and Aggravates Steatohepatitis in Mice
Source: MDPI journal article supplement (doi:10.3390/ijms22042126), 2021-02-20
Supplement: s1 [file s1]

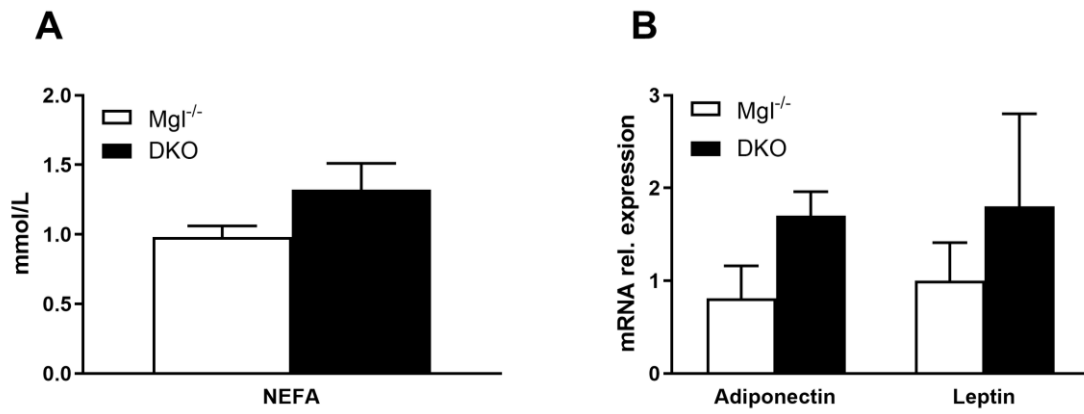

**Supplemental Fig. 1.** (A) NEFA were measured in sera from *Mgl<sup>-/-</sup>* and *DKO* mice. (B) *Adiponectin* and *leptin* gene expression were measured in AT from *Mgl<sup>-/-</sup>* and *DKO* mice fed HFD.
